# Supplementary material for: Postglacial dispersal patterns and mitochondrial genetic structure of the Pyrenean desman (Galemys pyrenaicus) in the northwestern region of the Iberian Peninsula
Source: PubMed Central journal article supplement (PMC5478051; doi:10.1002/ece3.3034), 2017-05-15
Supplement: ECE3-7-4486-s001.pdf [file ECE3-7-4486-s001.pdf]

## **SUPPORTING INFORMATION**

Ecology and Evolution

**Postglacial dispersal patterns and mitochondrial genetic structure of the Pyrenean desman (*Galemys pyrenaicus*) in the north-western region of the Iberian Peninsula**

Marina Querejeta, Angel Fernández-González, Rafael Romero and Jose Castresana

**Table S1.** Samples used in this study, including those also used in a previous study.

| <b>Specimen code</b> | <b>Latitude</b> | <b>Longitude</b> | <b>Basin</b> | <b>Sample type</b> |
|----------------------|-----------------|------------------|--------------|--------------------|
| IBE-BC0064           | 42.69           | -8.31            | Ulla         | Otter faeces       |
| IBE-BC0093           | 42.01           | -6.74            | Duero        | Desman faeces      |
| IBE-BC0123           | 42.48           | -7.15            | Miño         | Otter faeces       |
| IBE-BC0129           | 42.01           | -6.74            | Duero        | Desman faeces      |
| IBE-BC0204           | 42.26           | -6.68            | Miño         | Desman faeces      |
| IBE-BC0256           | 43.00           | -5.69            | Duero        | Desman faeces      |
| IBE-BC0259           | 42.92           | -5.29            | Duero        | Desman faeces      |
| IBE-BC0269           | 42.22           | -6.85            | Miño         | Desman faeces      |
| IBE-BC0311           | 42.06           | -6.69            | Duero        | Desman faeces      |
| IBE-BC0370           | 42.04           | -6.76            | Duero        | Desman faeces      |
| IBE-BC0377           | 43.02           | -5.61            | Duero        | Desman faeces      |
| IBE-BC0384           | 42.11           | -6.97            | Miño         | Desman faeces      |
| IBE-BC0388           | 42.03           | -6.90            | Duero        | Desman faeces      |
| IBE-BC0389           | 42.06           | -6.93            | Duero        | Desman faeces      |
| IBE-BC0401           | 42.03           | -6.76            | Duero        | Desman faeces      |
| IBE-BC0472           | 42.90           | -5.87            | Duero        | Desman faeces      |
| IBE-BC0476           | 41.90           | -6.44            | Duero        | Desman faeces      |
| IBE-BC0483           | 42.43           | -6.55            | Miño         | Desman faeces      |
| IBE-BC0497           | 42.84           | -6.11            | Duero        | Desman faeces      |
| IBE-BC0505           | 42.12           | -6.68            | Duero        | Desman faeces      |
| IBE-BC0508           | 42.14           | -6.43            | Duero        | Desman faeces      |
| IBE-BC0541           | 41.99           | -6.67            | Duero        | Desman faeces      |
| IBE-BC0542           | 42.16           | -6.54            | Duero        | Desman faeces      |
| IBE-BC0567           | 42.19           | -6.35            | Duero        | Desman faeces      |
| IBE-BC0586           | 42.93           | -6.42            | Miño         | Desman faeces      |
| IBE-BC0605           | 42.07           | -6.45            | Duero        | Desman faeces      |
| IBE-BC0615           | 43.03           | -5.71            | Duero        | Desman faeces      |
| IBE-BC0618           | 43.00           | -5.58            | Duero        | Desman faeces      |
| IBE-BC0623           | 42.90           | -5.96            | Duero        | Desman faeces      |
| IBE-BC0648           | 43.05           | -4.85            | Duero        | Desman faeces      |

|            |       |       |       |               |
|------------|-------|-------|-------|---------------|
| IBE-BC0652 | 43.05 | -4.77 | Duero | Desman faeces |
| IBE-BC0653 | 43.03 | -5.44 | Duero | Desman faeces |
| IBE-BC0692 | 43.16 | -5.04 | Sella | Desman faeces |
| IBE-BC0702 | 42.97 | -5.66 | Duero | Desman faeces |
| IBE-BC0718 | 43.02 | -5.61 | Duero | Desman faeces |
| IBE-BC0723 | 43.00 | -6.23 | Miño  | Desman faeces |
| IBE-BC0725 | 42.99 | -5.74 | Duero | Desman faeces |
| IBE-BC0734 | 43.05 | -4.82 | Duero | Desman faeces |
| IBE-BC0780 | 43.03 | -4.77 | Duero | Desman faeces |
| IBE-BC0800 | 43.02 | -5.35 | Duero | Desman faeces |
| IBE-BC0803 | 42.83 | -6.15 | Duero | Desman faeces |
| IBE-BC0807 | 42.78 | -6.10 | Duero | Desman faeces |
| IBE-BC0809 | 42.80 | -6.21 | Duero | Desman faeces |
| IBE-BC0816 | 42.81 | -5.82 | Duero | Desman faeces |
| IBE-BC0830 | 42.84 | -6.37 | Miño  | Desman faeces |
| IBE-BC0839 | 42.91 | -6.84 | Navia | Desman faeces |
| IBE-BC0843 | 42.84 | -6.77 | Miño  | Desman faeces |
| IBE-BC0854 | 42.94 | -4.24 | Duero | Desman faeces |
| IBE-BC0858 | 42.90 | -6.72 | Miño  | Desman faeces |
| IBE-BC0859 | 42.77 | -6.78 | Miño  | Desman faeces |
| IBE-BC0869 | 42.89 | -6.64 | Miño  | Desman faeces |
| IBE-BC0871 | 42.73 | -6.84 | Miño  | Desman faeces |
| IBE-BC0887 | 43.00 | -4.69 | Duero | Desman faeces |
| IBE-BC0891 | 42.96 | -6.31 | Miño  | Desman faeces |
| IBE-BC0893 | 42.83 | -5.84 | Duero | Desman faeces |
| IBE-BC0900 | 42.76 | -6.31 | Miño  | Desman faeces |
| IBE-BC0945 | 42.92 | -8.13 | Ulla  | Desman faeces |
| IBE-BC0948 | 43.04 | -6.06 | Duero | Desman faeces |
| IBE-BC0951 | 42.94 | -4.32 | Duero | Desman faeces |
| IBE-BC0956 | 42.99 | -6.11 | Duero | Desman faeces |
| IBE-BC0959 | 42.76 | -6.75 | Miño  | Desman faeces |
| IBE-BC0961 | 42.77 | -6.29 | Miño  | Desman faeces |
| IBE-BC0980 | 42.71 | -6.71 | Miño  | Desman faeces |

|            |       |       |       |                  |
|------------|-------|-------|-------|------------------|
| IBE-BC1008 | 42.86 | -6.51 | Miño  | Desman faeces    |
| IBE-BC1055 | 42.91 | -5.15 | Duero | Desman faeces    |
| IBE-BC1077 | 42.93 | -5.08 | Duero | Desman faeces    |
| IBE-C1154  | 43.17 | -6.79 | Navia | Igea et al. 2013 |
| IBE-C1174  | 43.15 | -6.80 | Navia | Igea et al. 2013 |
| IBE-C1177  | 43.15 | -6.80 | Navia | Igea et al. 2013 |
| IBE-C1729  | 43.01 | -4.27 | Ebro  | Igea et al. 2013 |
| IBE-C1843  | 43.10 | -6.75 | Nalon | Igea et al. 2013 |
| IBE-C1851  | 43.14 | -4.81 | Deva  | Igea et al. 2013 |
| IBE-C1869  | 43.28 | -6.73 | Navia | Igea et al. 2013 |
| IBE-C2517  | 43.15 | -5.41 | Nalón | Igea et al. 2013 |
| IBE-C2607  | 43.15 | -5.26 | Nalón | Igea et al. 2013 |
| IBE-C2736  | 42.25 | -8.40 | Miño  | Igea et al. 2013 |
| IBE-C2737  | 42.75 | -8.37 | Ulla  | Igea et al. 2013 |
| IBE-C2738  | 42.75 | -8.37 | Ulla  | Igea et al. 2013 |
| IBE-C2739  | 42.08 | -7.44 | Duero | Igea et al. 2013 |
| IBE-C2740  | 42.24 | -6.83 | Miño  | Igea et al. 2013 |
| IBE-C2741  | 42.24 | -6.83 | Miño  | Igea et al. 2013 |
| IBE-C2742  | 42.19 | -7.94 | Miño  | Igea et al. 2013 |
| IBE-C2743  | 42.19 | -7.94 | Miño  | Igea et al. 2013 |
| IBE-C2745  | 43.23 | -7.05 | Navia | Igea et al. 2013 |
| IBE-C2747  | 42.24 | -7.43 | Miño  | Igea et al. 2013 |
| IBE-C2750  | 42.12 | -8.39 | Miño  | Igea et al. 2013 |
| IBE-C2751  | 42.13 | -7.35 | Miño  | Igea et al. 2013 |
| IBE-C2752  | 42.13 | -7.35 | Miño  | Igea et al. 2013 |
| IBE-C2753  | 42.94 | -7.06 | Navia | Igea et al. 2013 |
| IBE-C2754  | 42.42 | -7.00 | Miño  | Igea et al. 2013 |
| IBE-C2856  | 43.12 | -4.56 | Deva  | Igea et al. 2013 |
| IBE-C2893  | 43.18 | -4.90 | Deva  | Igea et al. 2013 |
| IBE-C2894  | 43.22 | -4.90 | Deva  | Igea et al. 2013 |
| IBE-C2950  | 43.17 | -5.39 | Nalón | Igea et al. 2013 |
| IBE-C2975  | 41.57 | -7.68 | Duero | Igea et al. 2013 |
| IBE-C2990  | 41.62 | -7.84 | Duero | Igea et al. 2013 |

|           |       |       |       |                  |
|-----------|-------|-------|-------|------------------|
| IBE-C3301 | 41.79 | -6.55 | Duero | Igea et al. 2013 |
| IBE-C3303 | 40.84 | -7.78 | Duero | Igea et al. 2013 |
| IBE-C3305 | 40.84 | -7.78 | Duero | Igea et al. 2013 |
| IBE-C3338 | 43.08 | -4.54 | Deva  | Igea et al. 2013 |
| IBE-C3342 | 43.07 | -4.50 | Deva  | Igea et al. 2013 |
| IBE-C3522 | 41.91 | -6.77 | Duero | Igea et al. 2013 |
| IBE-C3541 | 41.80 | -6.69 | Duero | Igea et al. 2013 |
| IBE-C3542 | 42.92 | -8.08 | Ulla  | Desman faeces    |
| IBE-C3545 | 41.91 | -6.77 | Duero | Igea et al. 2013 |
| IBE-C3557 | 43.35 | -7.04 | Eo    | Desman faeces    |
| IBE-C3568 | 42.04 | -6.81 | Duero | Desman faeces    |
| IBE-C3602 | 41.33 | -7.80 | Duero | Igea et al. 2013 |
| IBE-C3620 | 42.93 | -5.40 | Duero | Igea et al. 2013 |
| IBE-C3623 | 43.15 | -5.41 | Nalón | Igea et al. 2013 |
| IBE-C3638 | 41.91 | -6.77 | Duero | Igea et al. 2013 |
| IBE-C3641 | 43.15 | -5.30 | Nalón | Igea et al. 2013 |
| IBE-C3647 | 41.91 | -6.77 | Duero | Igea et al. 2013 |
| IBE-C3795 | 42.69 | -8.39 | Ulla  | Desman faeces    |
| IBE-C3812 | 42.72 | -8.47 | Ulla  | Desman faeces    |
| IBE-C3813 | 42.87 | -7.88 | Ulla  | Desman faeces    |
| IBE-C3822 | 42.73 | -8.40 | Ulla  | Desman faeces    |
| IBE-C3828 | 42.75 | -8.01 | Ulla  | Desman faeces    |
| IBE-C3833 | 42.97 | -8.10 | Ulla  | Desman faeces    |
| IBE-C3834 | 42.90 | -8.11 | Ulla  | Desman faeces    |
| IBE-C3843 | 42.86 | -8.28 | Ulla  | Desman faeces    |
| IBE-C3848 | 42.79 | -8.40 | Ulla  | Desman faeces    |
| IBE-C3849 | 42.75 | -8.20 | Ulla  | Desman faeces    |
| IBE-C3852 | 42.74 | -8.03 | Ulla  | Desman faeces    |
| IBE-C3868 | 42.75 | -8.11 | Ulla  | Desman faeces    |
| IBE-C438  | 42.97 | -6.00 | Duero | Igea et al. 2013 |
| IBE-C4402 | 43.22 | -7.83 | Miño  | Otter faeces     |
| IBE-C4403 | 42.53 | -8.42 | Lerez | Otter faeces     |
| IBE-C4404 | 42.33 | -7.25 | Miño  | Otter faeces     |

|           |       |       |        |              |
|-----------|-------|-------|--------|--------------|
| IBE-C4405 | 42.92 | -7.21 | Miño   | Otter faeces |
| IBE-C4407 | 42.03 | -7.99 | Limia  | Otter faeces |
| IBE-C4409 | 42.27 | -7.65 | Miño   | Otter faeces |
| IBE-C4410 | 42.83 | -7.95 | Ulla   | Otter faeces |
| IBE-C4411 | 43.14 | -9.05 | Grande | Otter faeces |
| IBE-C4412 | 42.50 | -7.22 | Miño   | Otter faeces |
| IBE-C4413 | 43.04 | -8.10 | Tambre | Otter faeces |
| IBE-C4414 | 43.06 | -8.14 | Tambre | Otter faeces |
| IBE-C4415 | 43.07 | -8.11 | Tambre | Otter faeces |
| IBE-C4417 | 42.85 | -8.00 | Ulla   | Otter faeces |
| IBE-C4418 | 43.13 | -7.49 | Miño   | Otter faeces |
| IBE-C4420 | 43.19 | -7.39 | Miño   | Otter faeces |
| IBE-C4422 | 42.99 | -7.95 | Ulla   | Otter faeces |
| IBE-C4423 | 42.71 | -8.54 | Ulla   | Otter faeces |
| IBE-C4424 | 42.90 | -8.19 | Ulla   | Otter faeces |
| IBE-C4428 | 42.75 | -8.31 | Ulla   | Otter faeces |
| IBE-C4429 | 42.98 | -7.40 | Miño   | Otter faeces |
| IBE-C4431 | 42.97 | -7.32 | Miño   | Otter faeces |
| IBE-C4433 | 42.97 | -7.44 | Miño   | Otter faeces |
| IBE-C4435 | 43.29 | -7.69 | Miño   | Otter faeces |
| IBE-C4437 | 43.02 | -7.35 | Miño   | Otter faeces |
| IBE-C4438 | 43.01 | -7.37 | Miño   | Otter faeces |
| IBE-C4440 | 42.96 | -7.48 | Miño   | Otter faeces |
| IBE-C4441 | 42.81 | -7.86 | Ulla   | Otter faeces |
| IBE-C4442 | 42.86 | -7.96 | Ulla   | Otter faeces |
| IBE-C4449 | 42.95 | -7.98 | Ulla   | Otter faeces |
| IBE-C4451 | 42.76 | -8.08 | Ulla   | Otter faeces |
| IBE-C4452 | 42.70 | -8.01 | Ulla   | Otter faeces |
| IBE-C4453 | 42.68 | -8.00 | Ulla   | Otter faeces |
| IBE-C4454 | 42.74 | -8.28 | Ulla   | Otter faeces |
| IBE-C4459 | 42.65 | -8.17 | Ulla   | Otter faeces |
| IBE-C4460 | 42.61 | -8.13 | Ulla   | Otter faeces |
| IBE-C4461 | 42.94 | -7.97 | Ulla   | Otter faeces |

|            |       |       |       |                  |
|------------|-------|-------|-------|------------------|
| IBE-C4462  | 42.90 | -8.01 | Ulla  | Otter faeces     |
| IBE-C4465  | 42.98 | -7.95 | Ulla  | Otter faeces     |
| IBE-C4466  | 42.91 | -8.16 | Ulla  | Otter faeces     |
| IBE-C4470  | 42.79 | -8.48 | Ulla  | Otter faeces     |
| IBE-C4473  | 42.71 | -8.28 | Ulla  | Otter faeces     |
| IBE-C4474  | 42.85 | -8.02 | Ulla  | Otter faeces     |
| IBE-C4476  | 42.85 | -7.99 | Ulla  | Otter faeces     |
| IBE-C4477  | 42.86 | -7.92 | Ulla  | Otter faeces     |
| IBE-C4478  | 42.90 | -7.90 | Ulla  | Otter faeces     |
| IBE-C448   | 42.81 | -6.38 | Miño  | Igea et al. 2013 |
| IBE-C449   | 43.10 | -6.25 | Nalon | Igea et al. 2013 |
| IBE-C539   | 43.24 | -4.58 | Deva  | Igea et al. 2013 |
| IBE-C618   | 43.09 | -4.07 | Duero | Igea et al. 2013 |
| IBE-C683   | 43.09 | -4.07 | Saja  | Igea et al. 2013 |
| IBE-C720   | 43.13 | -4.81 | Deva  | Igea et al. 2013 |
| IBE-C723   | 43.11 | -4.76 | Deva  | Igea et al. 2013 |
| IBE-C779   | 41.58 | -7.96 | Duero | Igea et al. 2013 |
| IBE-C802   | 41.59 | -7.82 | Duero | Igea et al. 2013 |
| IBE-C831   | 41.62 | -7.88 | Duero | Igea et al. 2013 |
| IBE-C844   | 41.67 | -7.47 | Duero | Igea et al. 2013 |
| IBE-C894   | 41.54 | -7.76 | Duero | Igea et al. 2013 |
| IBE-C895   | 41.46 | -7.81 | Duero | Igea et al. 2013 |
| IBE-C919   | 41.54 | -7.76 | Duero | Igea et al. 2013 |
| IBE-C922   | 41.49 | -7.90 | Duero | Igea et al. 2013 |
| IBE-C975   | 43.09 | -4.86 | Duero | Igea et al. 2013 |
| IBE-LE0402 | 43.01 | -5.23 | Duero | Desman faeces    |
| IBE-LE0406 | 43.07 | -5.27 | Duero | Desman faeces    |
| IBE-LE0411 | 43.06 | -5.29 | Duero | Desman faeces    |
| IBE-LE0529 | 43.02 | -4.90 | Duero | Desman faeces    |
| IBE-LE0536 | 42.99 | -4.84 | Duero | Desman faeces    |

---

Igea, J., P. Aymerich, A. Fernández-González, J. González-Esteban, A. Gómez, R. Alonso, J. Gosálbez, and J. Castresana. 2013. Phylogeography and postglacial expansion of the endangered semi-aquatic mammal *Galemys pyrenaicus*. BMC Evol. Biol. 13:115.

**Table S2.** Analysis of Molecular Variance (AMOVA) for the phylogenetic distances between desmans inhabiting isolated river basins and within desmans inhabiting isolated river basins. % is the percentage of variance explained by the isolation of river basins.

| <b>Source of variation</b> | <b>d.f.</b> | <b>SS</b> | <b>MS</b> | <b>Est. Variance</b> | <b>%</b> | <b>P-value</b> |
|----------------------------|-------------|-----------|-----------|----------------------|----------|----------------|
| Among basins               | 9           | 0.0012429 | 0.0001381 | 0.0000102            | 53.8     | ***            |
| Within basins              | 147         | 0.0012894 | 0.0000087 | 0.0000087            | 46.2     | ***            |
| Total                      | 156         | 0.0025324 | 0.0000162 | 0.0000189            |          |                |



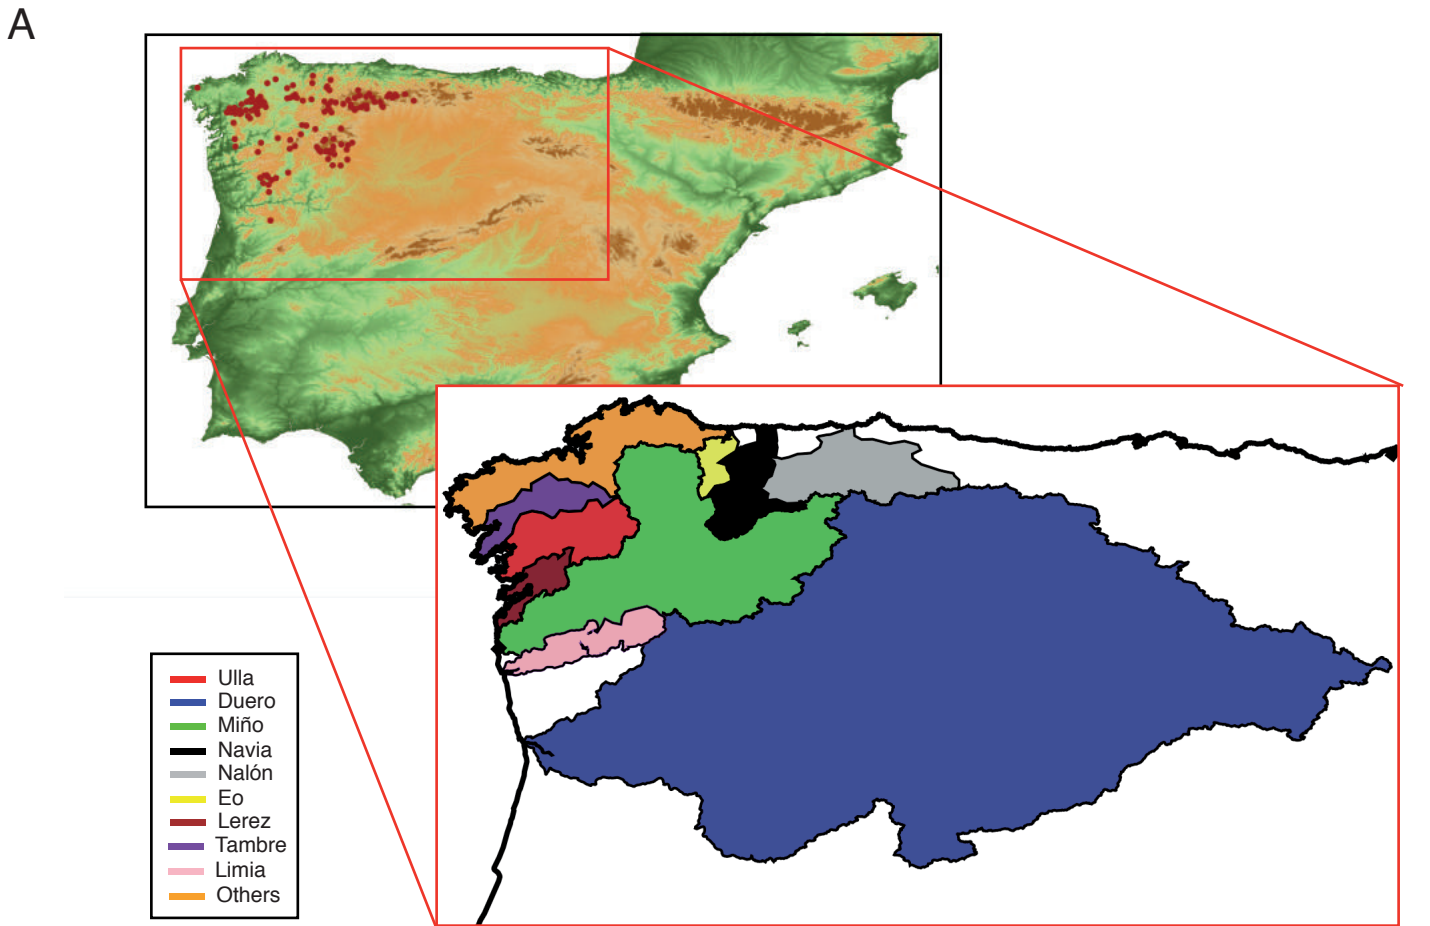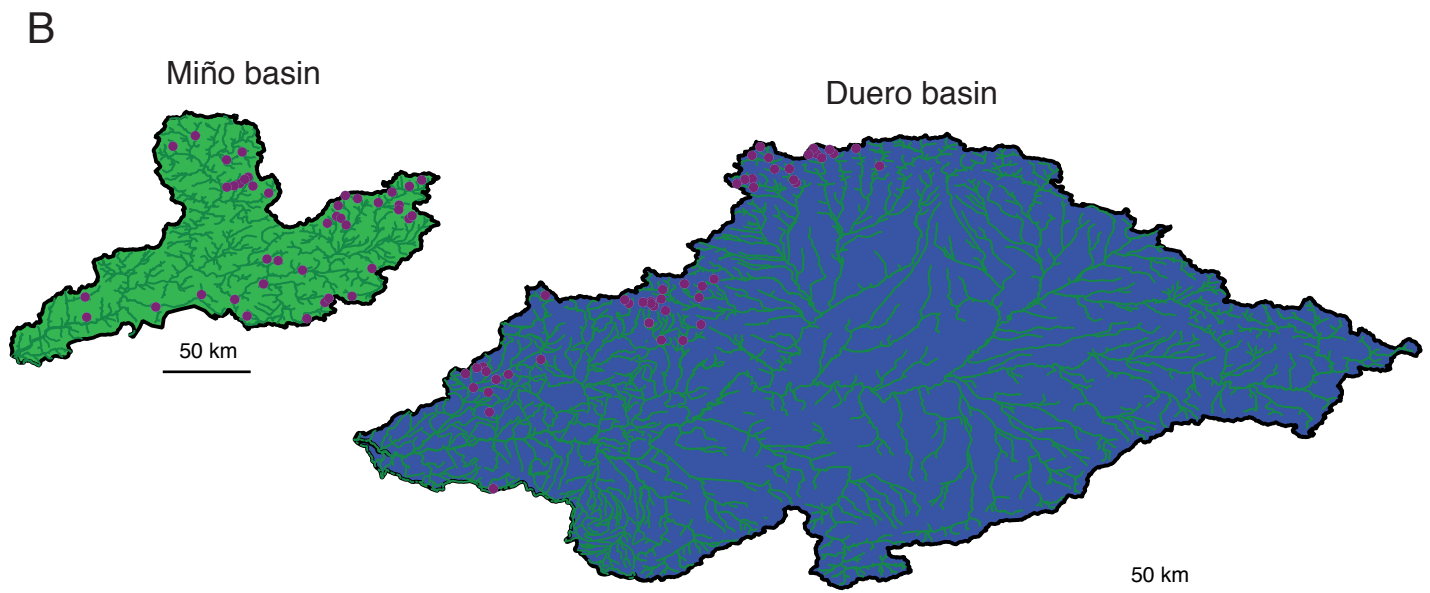

**Figure S1.** Map of the study area showing the main basins (A), and enlargement of the Miño and Duero basins (B). A number of smaller basins were grouped as “Others”.

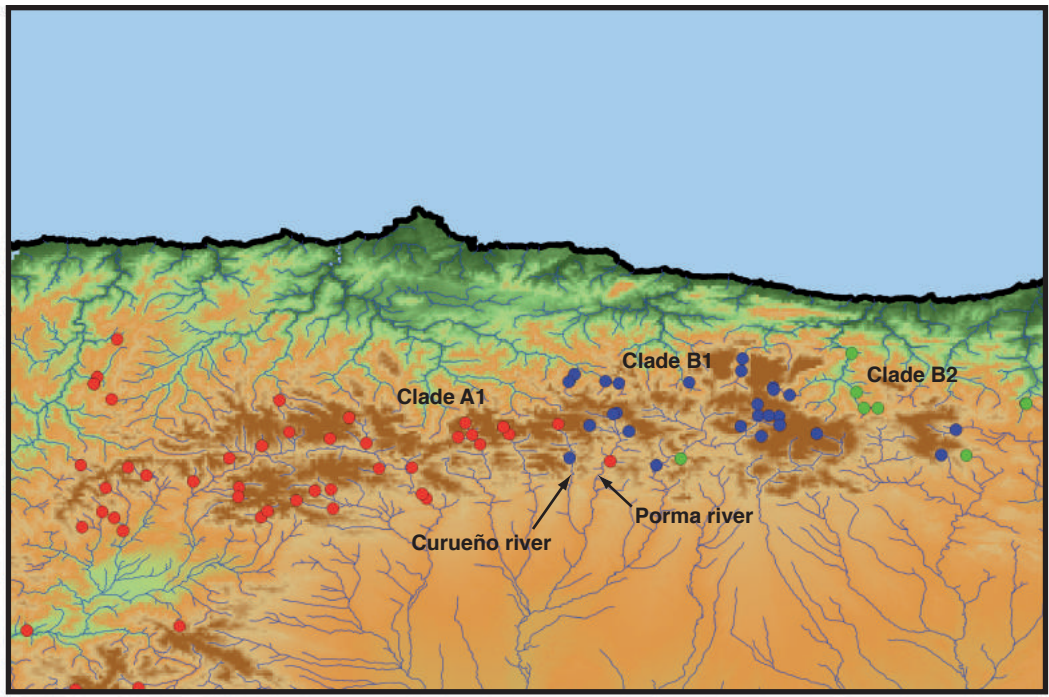

**Figure S2.** Enlargement of the contact zone between the main mitochondrial clades in the Cantabrian Mountains.
